# Supplementary material for: Diagnostic Accuracy of Differential-Diagnosis Lists Generated by Generative Pretrained Transformer 3 Chatbot for Clinical Vignettes with Common Chief Complaints: A Pilot Study
Source: MDPI journal article supplement (doi:10.3390/ijerph20043378), 2023-02-15
Supplement: s1 [file s1]

Supplemental Figure S2: Single correct diagnosis of the clinical vignettes and the ten differential-diagnosis lists created through ChatGPT-3.

| No  | Chief complaint | Correct diagnosis  | Differential-diagnosis list by ChatGPT-3                                                                                                                                                                                                                                                                                                                                |
|-----|-----------------|--------------------|-------------------------------------------------------------------------------------------------------------------------------------------------------------------------------------------------------------------------------------------------------------------------------------------------------------------------------------------------------------------------|
| 1-1 | Abdominal pain  | Cholecystitis      | <ol style="list-style-type: none"> <li>1. Gastroesophageal reflux disease (GERD)</li> <li>2. Peptic ulcer disease</li> <li>3. Gastritis</li> <li><u>4. Acute cholecystitis</u></li> <li>5. Pancreatitis</li> <li>6. Hiatal hernia</li> <li>7. Pancreatic cancer</li> <li>8. Small intestine obstruction</li> <li>9. Appendicitis</li> <li>10. Stomach cancer</li> </ol> |
| 1-2 | Abdominal pain  | Appendicitis       | <ol style="list-style-type: none"> <li><u>1. Appendicitis</u></li> <li>2. Gastroenteritis</li> <li>3. Ovarian torsion</li> <li>4. Urinary tract infection</li> <li>5. Ectopic pregnancy</li> <li>6. Pelvic inflammatory disease</li> <li>7. Endometriosis</li> <li>8. Constipation</li> <li>9. Irritable bowel syndrome</li> <li>10. Diverticulitis</li> </ol>          |
| 1-3 | Abdominal pain  | Acute pancreatitis | <ol style="list-style-type: none"> <li><u>1. Acute pancreatitis</u></li> <li>2. Gastroenteritis</li> <li>3. Peptic ulcer disease</li> <li>4. Gallbladder disease</li> <li>5. Hepatitis</li> <li>6. Esophageal reflux disease (GERD)</li> <li>7. Alcoholic liver disease</li> <li>8. Appendicitis</li> <li>9. Constipation</li> <li>10. Food poisoning</li> </ol>        |
| 2-1 | Fever           | Pyelonephritis     | <ol style="list-style-type: none"> <li><u>1. Urinary tract infection</u></li> <li>2. Kidney stone</li> </ol>                                                                                                                                                                                                                                                            |

|     |            |                             |                                                                                                                                                                                                                                               |
|-----|------------|-----------------------------|-----------------------------------------------------------------------------------------------------------------------------------------------------------------------------------------------------------------------------------------------|
|     |            |                             | 3. Pneumonia<br>4. Sepsis<br>5. Influenza<br>6. Gastroenteritis<br>7. Malignancy<br>8. Drug reaction<br>9. Thyroiditis<br>10. Rheumatoid arthritis                                                                                            |
| 2-2 | Fever      | Infectious mononucleosis    | 1. Acute tonsillitis<br>2. Acute pharyngitis<br><u>3. Mononucleosis</u><br>4. Influenza<br>5. Measles<br>6. Mumps<br>7. Streptococcal infection<br>8. Adenovirus infection<br>9. Parvovirus infection<br>10. HIV infection                    |
| 2-3 | Fever      | Infective endocarditis (IE) | <u>1. Infective endocarditis</u><br>2. Pyelonephritis<br>3. Pneumonia<br>4. Urinary tract infection<br>5. Acute bronchitis<br>6. Gastroenteritis<br>7. Sepsis<br>8. Influenza<br>9. Tuberculosis<br>10. Malaria                               |
| 3-1 | Chest pain | Myocardial infarction       | <u>1. Acute coronary syndrome</u><br>(e.g. myocardial infarction, unstable angina)<br>2. Pulmonary embolism<br>3. Aortic dissection<br>4. Pneumonia<br>5. Esophageal spasm or acute gastroesophageal reflux disease (GERD)<br>6. Pericarditis |

|     |                      |                                   |                                                                                                                                                                                                                                                                                          |
|-----|----------------------|-----------------------------------|------------------------------------------------------------------------------------------------------------------------------------------------------------------------------------------------------------------------------------------------------------------------------------------|
|     |                      |                                   | 7. Hypertensive crisis<br>8. Pulmonary hypertension<br>9. Anaphylaxis<br>10. Pneumothorax                                                                                                                                                                                                |
| 3-2 | Chest pain           | Acute myocardial infarction (AMI) | <u>1. Myocardial infarction (heart attack)</u><br>2. Angina pectoris<br>3. Aortic aneurysm<br>4. Pulmonary embolism<br>5. Pericarditis<br>6. Acute coronary syndrome<br>7. Cardiomyopathy<br>8. Aortic stenosis<br>9. Mitral stenosis<br>10. Pulmonary hypertension                      |
| 3-3 | Chest pain           | Pulmonary embolism (PE)           | 1. Myocardial infarction (heart attack)<br>2. Aortic dissection<br><u>3. Pulmonary embolism</u><br>4. Pericarditis<br>5. Angina<br>6. Hypertrophic cardiomyopathy<br>7. Anterior wall myocardial infarction<br>8. Mitral valve prolapse<br>9. Panic attack<br>10. Pulmonary hypertension |
| 4-1 | Breathing difficulty | Pneumothorax                      | 1. Pneumonia<br>2. Pulmonary embolism<br>3. Chronic obstructive pulmonary disease (COPD)<br>4. Asthma<br>5. Bronchitis<br><u>6. Collapsed lung (pneumothorax)</u><br>7. Pulmonary edema<br>8. Heart failure<br>9. Pleural effusion<br>10. Esophageal cancer                              |
| 4-2 | Breathing            | Chronic                           | <u>1. Chronic obstructive pulmonary disease</u>                                                                                                                                                                                                                                          |

|     |                      |                                      |                                                                                                                                                                                                                                                                                     |
|-----|----------------------|--------------------------------------|-------------------------------------------------------------------------------------------------------------------------------------------------------------------------------------------------------------------------------------------------------------------------------------|
|     | difficulty           | obstructive pulmonary disease (COPD) | <u>(COPD)</u><br>2. Bronchitis<br>3. Emphysema<br>4. Pulmonary fibrosis<br>5. Chronic bronchitis<br>6. Asthma<br>7. Pulmonary embolism<br>8. Lung cancer<br>9. Pneumonia<br>10. Heart failure                                                                                       |
| 4-3 | Breathing difficulty | Hypersensitivity pneumonia           | 1. Pneumonia<br>2. Bronchitis<br>3. Asthma<br>4. Pulmonary embolism<br>5. Tuberculosis<br>6. Influenza (the flu)<br>7. Heart failure<br>8. Chronic obstructive pulmonary disease (COPD)<br>9. Allergic reactions<br>10. Anaphylaxis                                                 |
| 5-1 | Joint pain           | Rheumatoid arthritis                 | 1. <u>Rheumatoid arthritis</u><br>2. Osteoarthritis<br>3. Gout<br>4. Psoriatic arthritis<br>5. Systemic lupus erythematosus<br>6. Scleroderma<br>7. Raynaud's phenomenon<br>8. Carpal tunnel syndrome<br>9. Tennis elbow (lateral epicondylitis)<br>10. De Quervain's tenosynovitis |
| 5-2 | Joint pain           | Osteoarthritis                       | 1. <u>Osteoarthritis</u><br>2. Rheumatoid arthritis<br>3. Gout<br>4. Bursitis<br>5. Tendinitis                                                                                                                                                                                      |

|     |            |                                    |                                                                                                                                                                                                                                                                                                                                                                                                                                                                                                                                                                                                                                           |
|-----|------------|------------------------------------|-------------------------------------------------------------------------------------------------------------------------------------------------------------------------------------------------------------------------------------------------------------------------------------------------------------------------------------------------------------------------------------------------------------------------------------------------------------------------------------------------------------------------------------------------------------------------------------------------------------------------------------------|
|     |            |                                    | 6. Baker's cyst<br>7. Knee ligament injuries<br>8. Meniscal tears<br>9. Knee joint infections<br>10. Obesity                                                                                                                                                                                                                                                                                                                                                                                                                                                                                                                              |
| 5-3 | Joint pain | Systemic lupus erythematosus (SLE) | 1. Scleroderma<br>2. Rheumatoid arthritis<br><u>3. Systemic lupus erythematosus (SLE)</u><br>4. Dermatomyositis<br>5. Sjögren's syndrome<br>6. Psoriasis<br>7. Sunburn<br>8. Erythema multiforme<br>9. Rosacea<br>10. Polyarteritis nodosa                                                                                                                                                                                                                                                                                                                                                                                                |
| 6-1 | Vomiting   | Small bowel obstruction            | 1. Gastroenteritis (inflammation of the stomach and intestines, often caused by a viral or bacterial infection)<br>2. Peptic ulcer disease (ulcers in the lining of the stomach or small intestine)<br>3. Gastroparesis (delayed emptying of the stomach)<br>4. Gallbladder inflammation or infection (cholecystitis)<br>5. Pancreatitis (inflammation of the pancreas)<br><u>6. Small intestine obstruction</u><br>7. Appendicitis (inflammation of the appendix)<br>8. Diverticulitis (inflammation of small pouches in the intestine)<br>9. Constipation<br>10. Irritable bowel syndrome (a disorder that affects the large intestine) |
| 6-2 | Vomiting   | Subarachnoid hemorrhage            | 1. Migraine headache<br>2. Cluster headache                                                                                                                                                                                                                                                                                                                                                                                                                                                                                                                                                                                               |

|     |                           |                         |                                                                                                                                                                                                                                                                                                                                                                                                                                                                |
|-----|---------------------------|-------------------------|----------------------------------------------------------------------------------------------------------------------------------------------------------------------------------------------------------------------------------------------------------------------------------------------------------------------------------------------------------------------------------------------------------------------------------------------------------------|
|     |                           |                         | 3. Tension-type headache<br>4. Acute sinusitis<br>5. Temporal arteritis<br>6. Hypertensive crisis<br><u>7. Subarachnoid hemorrhage</u><br>8. Reversible cerebral vasoconstriction syndrome<br>9. Intracranial hypotension<br>10. Spontaneous intracranial hypotension                                                                                                                                                                                          |
| 6-3 | Vomiting                  | Bowel obstruction       | 1. Acute gastroenteritis<br>2. Acute cholecystitis (inflammation of the gallbladder)<br>3. Acute pancreatitis<br><u>4. Small bowel obstruction</u><br>5. Mesenteric ischemia (restricted blood flow to the intestine)<br>6. Inflammatory bowel disease (such as Crohn's disease or ulcerative colitis)<br>7. Diverticulitis (inflammation of small, bulging sacs in the intestine)<br>8. Appendicitis<br>9. Abdominal aortic aneurysm<br>10. Abdominal abscess |
| 7-1 | Ataxia/difficulty walking | Wernicke encephalopathy | 1. Alcoholic cerebellar degeneration<br><u>2. Wernicke-Korsakoff syndrome</u><br>3. Intoxication or withdrawal from alcohol or other substances<br>4. Infection, such as meningitis or encephalitis<br>5. Vitamin deficiency, such as thiamine deficiency<br>6. Stroke or transient ischemic attack<br>7. Multiple sclerosis<br>8. Brain tumor<br>9. Chronic alcoholism<br>10. Neurodegenerative disorders, such as                                            |

|     |                           |                                              |                                                                                                                                                                                                                                                                                                                                                               |
|-----|---------------------------|----------------------------------------------|---------------------------------------------------------------------------------------------------------------------------------------------------------------------------------------------------------------------------------------------------------------------------------------------------------------------------------------------------------------|
|     |                           |                                              | Parkinson's disease or multiple system atrophy                                                                                                                                                                                                                                                                                                                |
| 7-2 | Ataxia/difficulty walking | Cerebral infarction (Wallenberg syndrome)    | <u>1. Stroke</u><br>2. Transient ischemic attack (TIA)<br>3. Vertebrobasilar insufficiency<br>4. Intracerebral hemorrhage<br>5. Brainstem infarction<br>6. Multiple sclerosis<br>7. Brain tumor<br>8. Acoustic neuroma<br>9. Migraine<br>10. Alcoholic cerebellar degeneration                                                                                |
| 7-3 | Ataxia/difficulty walking | Cerebral infarction                          | <u>1. Stroke (cerebrovascular accident)</u><br>2. Transient ischemic attack<br>3. Vestibular disorder<br>4. Hypertensive crisis<br>5. Hypoglycemic episode (related to diabetes)<br>6. Cardiac arrhythmia<br>7. Hemorrhage or aneurysm<br>8. Migraine headache<br>9. Seizure<br>10. Infectious or inflammatory condition (such as meningitis or encephalitis) |
| 8-1 | Back pain                 | Nonspecific back pain (musculoskeletal pain) | <u>1. Muscular strain or sprain</u><br>2. Lumbar strain<br>3. Lumbar herniated disc<br>4. Lumbar spinal stenosis<br>5. Lumbar degenerative disc disease<br>6. Osteoarthritis<br>7. Spondylolisthesis<br>8. Ankylosing spondylitis<br>9. Fibromyalgia<br>10. Psychological factors                                                                             |
| 8-2 | Back pain                 | Aortic dissection                            | 1. Pulmonary embolism<br>2. Pneumonia                                                                                                                                                                                                                                                                                                                         |

|     |           |                                |                                                                                                                                                                                                                                           |
|-----|-----------|--------------------------------|-------------------------------------------------------------------------------------------------------------------------------------------------------------------------------------------------------------------------------------------|
|     |           |                                | <u>3. Aortic dissection</u><br>4. Heart attack<br>5. Hypertensive crisis<br>6. Spinal cord injury<br>7. Acute coronary syndrome<br>8. Pulmonary edema<br>9. Chronic obstructive pulmonary disease (COPD)<br>10. Ankylosing spondylitis    |
| 8-3 | Back pain | Malignant pleural mesothelioma | 1. Chronic bronchitis<br>2. Pneumonia<br>3. Pulmonary fibrosis<br>4. Lung cancer<br>5. Pleural effusion<br>6. Bronchiectasis<br>7. Tuberculosis<br>8. Pulmonary embolism<br>9. Chronic obstructive pulmonary disease (COPD)<br>10. Asthma |
| 9-1 | Cough     | Lung cancer                    | 1. Pneumonia<br>2. Chronic obstructive pulmonary disease (COPD)<br>3. Bronchitis<br>4. Tuberculosis<br><u>5. Lung cancer</u><br>6. Pulmonary embolism<br>7. Pulmonary fibrosis<br>8. Heart failure<br>9. Bronchiectasis<br>10. Asthma     |
| 9-2 | Cough     | Occupational asthma            | 1. Allergic bronchitis<br>2. Bronchitis<br>3. Sinusitis<br>4. Acid reflux: Gastroesophageal reflux disease (GERD)                                                                                                                         |



|      |           |                                             |                                                                                                                                                                                                                                                                                                      |
|------|-----------|---------------------------------------------|------------------------------------------------------------------------------------------------------------------------------------------------------------------------------------------------------------------------------------------------------------------------------------------------------|
|      |           |                                             | 5. Postnasal drip<br>6. Upper respiratory infection<br><u>7. Bronchial asthma</u><br>8. Pneumonia<br>9. Chronic obstructive pulmonary disease (COPD)<br>10. Pulmonary embolism                                                                                                                       |
| 9-3  | Cough     | Mycoplasma pneumonia                        | <u>1. Pneumonia</u><br>2. Bronchitis<br>3. Tuberculosis<br>4. Influenza<br>5. Measles<br>6. Whooping cough<br>7. Mumps<br>8. Pertussis<br>9. Leptospirosis<br>10. Q fever                                                                                                                            |
| 10-1 | Dizziness | Benign paroxysmal positional vertigo        | <u>1. Benign paroxysmal positional vertigo (BPPV)</u><br>2. Vestibular neuritis<br>3. Meniere's disease<br>4. Hypotension<br>5. Anemia<br>6. Migraine<br>7. Orthostatic hypotension<br>8. Dehydration<br>9. Hypoglycemia<br>10. Cardiovascular issues                                                |
| 10-2 | Dizziness | Benign Paroxysmal Positional Vertigo (BPPV) | <u>1. Benign paroxysmal positional vertigo (BPPV)</u><br>2. Vestibular neuritis or labyrinthitis<br>3. Meniere's disease<br>4. Stroke or transient ischemic attack (TIA)<br>5. Cardiovascular problems, such as orthostatic hypotension or arrhythmias<br>6. Neurological problems, such as multiple |

|      |           |                                             |                                                                                                                                                                                                                                                                                                                   |
|------|-----------|---------------------------------------------|-------------------------------------------------------------------------------------------------------------------------------------------------------------------------------------------------------------------------------------------------------------------------------------------------------------------|
|      |           |                                             | <p>sclerosis or brainstem compression</p> <p>7. Migraine-associated vertigo</p> <p>8. Drug-induced dizziness</p> <p>9. Anemia or other blood disorders</p> <p>10. Thyroid or other hormonal imbalance</p>                                                                                                         |
| 10-3 | Dizziness | Benign Paroxysmal Positional Vertigo (BPPV) | <p>1. Benign paroxysmal positional vertigo (BPPV)</p> <p>2. Labyrinthitis</p> <p>3. Vestibular neuritis</p> <p>4. Meniere's disease</p> <p>5. Acoustic neuroma</p> <p>6. Migraine</p> <p>7. Multiple sclerosis</p> <p>8. Stroke</p> <p>9. Transient ischemic attack (TIA)</p> <p>10. Chronic fatigue syndrome</p> |
